# Supplementary material for: Cluster Analysis Identifies Distinct Patterns of T-Cell and Humoral Immune Responses Evolution Following a Third Dose of SARS-CoV-2 Vaccine in People Living with HIV
Source: MDPI journal article supplement (doi:10.3390/v15071435), 2023-06-26
Supplement: s1 [file s1]

## Supplementary files

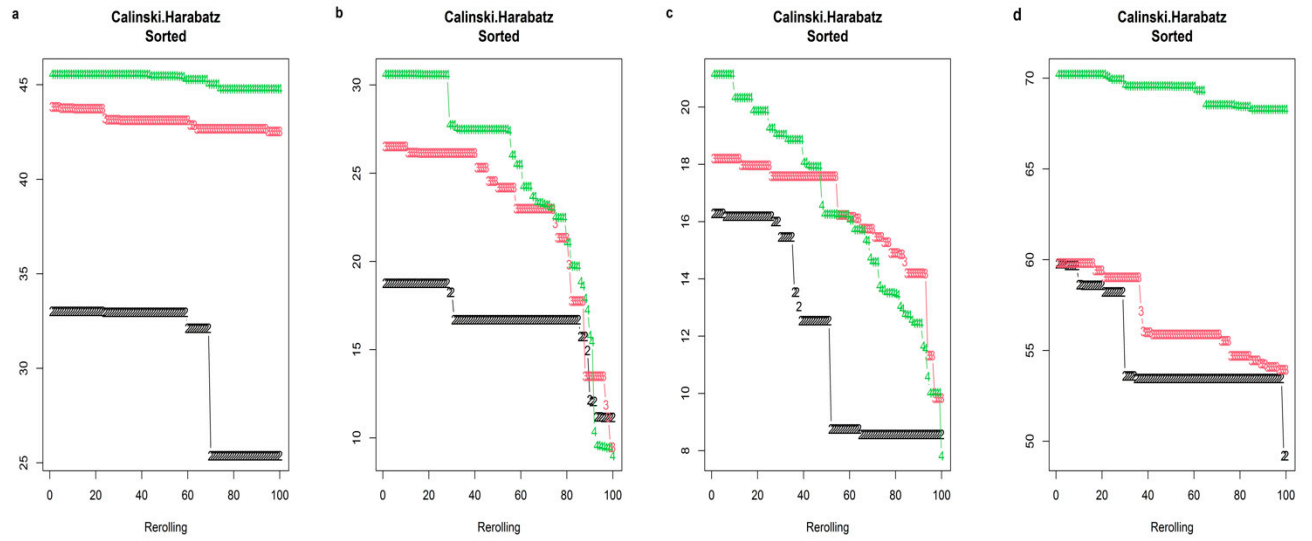

**Figure S1.** Clustering of T-cell and humoral immune responses evolution: Calinski and Harabatz criterion maximization. Clustering with 100 runs for each cluster; 2 (in black), 3 (in red), and 4 (in green) clusters. **a.** Clustering among SARS-CoV-2 naïve individuals (n = 68), **b.** clustering among SARS-CoV-2 naïve PLWH (n = 39), **c.** clustering among SARS-CoV-2 naïve HCWs (n = 29). **d.** clustering among all individuals either SARS-CoV-2 experienced and naïve individuals (n=131).

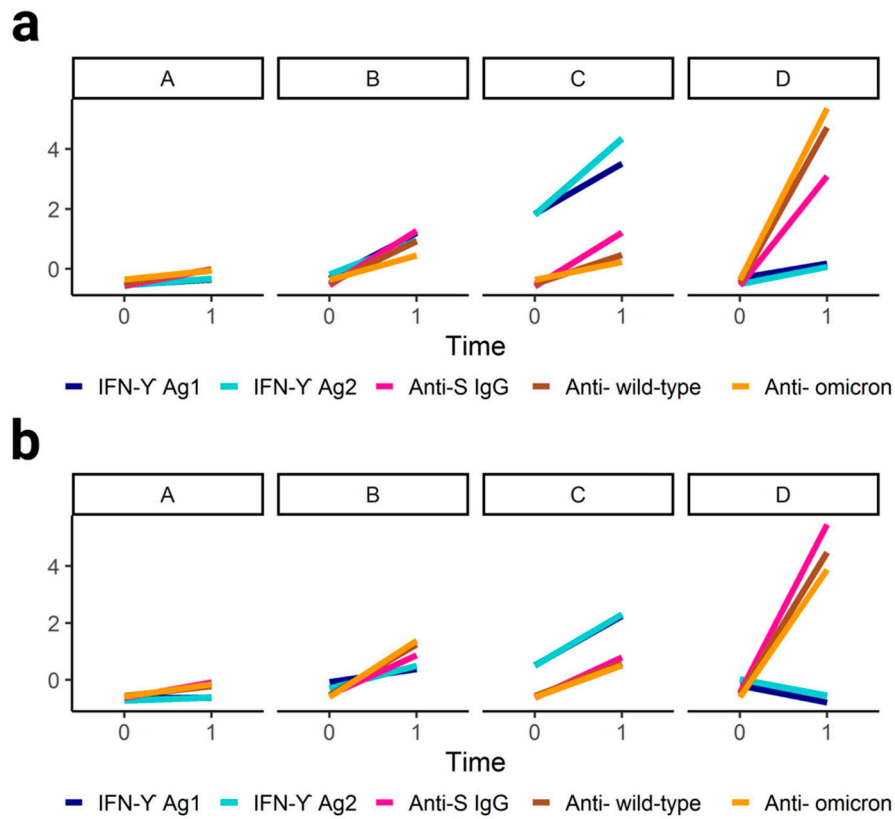

**Figure S2.** Clustering of T-cell and humoral immune responses evolution. IFN- $\gamma$  Ag1, IFN- $\gamma$  Ag2, Anti-S IgG, and neutralising antibody titers against Wild type and Omicron variants patterns of evolution in each of the four clusters (a) among SARS-CoV-2 naïve PLWH (cluster A: n = 21, cluster B: n = 10, cluster C: n = 2, cluster D: n = 2), (b) among SARS-CoV-2 naïve HCWs (cluster A: n = 13, cluster B: n = 9, cluster C: n = 5, cluster D: n = 1).

**Table S1.** IFN- $\gamma$  Ag1 and Ag2, Anti-S IgG, and neutralizing antibody titers against Wild-type and Omicron variants in each cluster.

| Variable                                                  | Cluster A<br>n = 86 | Cluster B<br>n = 21 | Cluster C<br>n = 10 | Cluster D<br>n = 3  |
|-----------------------------------------------------------|---------------------|---------------------|---------------------|---------------------|
| <b>IFN-<math>\gamma</math> Ag1</b>                        |                     |                     |                     |                     |
| T0                                                        | 0.35 (0.11-0.72)    | 1.6 (1.1-3.9)       | 0.32 (0.14-0.92)    | 9.9 (9.6-10.0)      |
| T1                                                        | 0.69 (0.31-1.4)     | 4.4 (3.3-5.5)       | 1.1 (0.50-1.4)      | 10.0 (9.9-10.0)     |
| <b>IFN-<math>\gamma</math> Ag2</b>                        |                     |                     |                     |                     |
| T0                                                        | 0.42 (0.15-1.0)     | 2.2 (1.9-4.8)       | 0.24 (0.17-0.90)    | 9.8 (9.7-9.9)       |
| T1                                                        | 0.91 (0.44-1.9)     | 6.1 (5.2-6.9)       | 1.7 (0.65-2.3)      | 10.0 (9.9-10.0)     |
| <b>Anti-S IgG</b>                                         |                     |                     |                     |                     |
| T0                                                        | 543 (304-1325)      | 1350 (315-2040)     | 927 (471-1705)      | 17500 (8963-24300)  |
| T1                                                        | 5270 (2882-9958)    | 11100 (3270-14900)  | 30900 (18300-38525) | 46400 (31850-50750) |
| <b>Neutralizing antibody titers<br/>against wild type</b> |                     |                     |                     |                     |
| T0                                                        | 80 (20-160)         | 160 (40-640)        | 80 (80-160)         | 5120 (2580-5120)    |
| T1                                                        | 1280 (640-2560)     | 2560 (640-5120)     | 10240 (10240-10240) | 10240 (10240-10240) |
| <b>Neutralizing antibody titers<br/>against omicron</b>   |                     |                     |                     |                     |
| T0                                                        | <20 (<20-<20)       | <20 (<20-40.0)      | <20 (<20-15)        | 320 (160-800)       |
| T1                                                        | 160 (80-320)        | 160 (80-320)        | 1280 (800-2240)     | 2560 (1600-3840)    |

*Results are expressed as Median (Q1-Q3).*

**Table S2.** Background characteristics of individuals in each cluster.

| Variable                                                  | Cluster A<br>n = 86 | Cluster B<br>n = 21 | Cluster C<br>n = 10 | Cluster D<br>n = 3 | Comparison<br>p-value |
|-----------------------------------------------------------|---------------------|---------------------|---------------------|--------------------|-----------------------|
| Male sex                                                  | 41 (47.7)           | 8 (38.1)            | 1 (10.0)            | 2 (66.7)           | 0.083                 |
| Age (Years)                                               | 43.7 ± 10.3         | 42.1 ± 10.1         | 51.0 ± 11.0         | 52.3 ± 16.0        | 0.078                 |
| 18-29                                                     | 5 (5.8)             | 0 (0.0)             | 1 (10.0)            | 0 (0.0)            |                       |
| 30-39                                                     | 31 (36.1)           | 12 (57.1)           | 0 (0.0)             | 1 (33.3)           |                       |
| 40-49                                                     | 23 (26.8)           | 3 (14.3)            | 2 (20.0)            | 0 (0.0)            |                       |
| 50-59                                                     | 21 (24.4)           | 4 (19.1)            | 6 (60.0)            | 0 (0.0)            |                       |
| ≥60                                                       | 6 (6.9)             | 2 (9.5)             | 1 (10.0)            | 2 (66.7)           |                       |
| BMI (kg/m <sup>2</sup> )                                  | 25.9 ± 5.1, n = 85  | 26.6 ± 7.4          | 31.3 ± 9.3          | 29.0 ± 3.8         | 0.052                 |
| < (<18.5)                                                 | 2 (2.3)             | 0 (0.0)             | 0 (0.0)             | 0 (0.0)            |                       |
| Normal range (18.5-24.9)                                  | 37 (43.5)           | 10 (47.6)           | 1 (10.0)            | 0 (0.0)            |                       |
| Overweight (25-29.9)                                      | 32 (37.7)           | 8 (38.1)            | 5 (50.0)            | 2 (66.7)           |                       |
| Obese (≥30)                                               | 14 (16.5)           | 3 (14.3)            | 4 (40.0)            | 1 (33.3)           |                       |
| Ethnicity, n = 71                                         |                     |                     |                     |                    | 0.0001                |
| Caucasian                                                 | 32 (59.3)           | 0 (0.0)             | 0 (0.0)             | 0 (0.0)            |                       |
| African                                                   | 19 (35.2)           | 6 (75.0)            | 6 (100.0)           | 3 (100.0)          |                       |
| Other                                                     | 3 (5.5)             | 2 (25.0)            | 0 (0.0)             | 0 (100.0)          |                       |
| Medical history                                           |                     |                     |                     |                    |                       |
| Diabetes mellitus                                         | 2 (2.3)             | 0 (0.0)             | 1 (10.0)            | 1 (33.3)           | -                     |
| Hypertension                                              | 13 (15.1)           | 3 (14.3)            | 5 (50.0)            | 0 (0.0)            | 0.066                 |
| Heart failure coronary artery disease                     | 2 (2.3)             | 0 (0.0)             | 0 (0.0)             | 0 (0.0)            | -                     |
| Stroke                                                    | 0 (0.0)             | 1 (4.8)             | 0 (0.0)             | 0 (0.0)            | -                     |
| Liver disease                                             | 1 (1.2)             | 0 (0.0)             | 0 (0.0)             | 0 (0.0)            | -                     |
| Kidney disease                                            | 0 (0.0)             | 0 (0.0)             | 0 (0.0)             | 0 (0.0)            | -                     |
| Chronic lung disease                                      | 1 (1.2)             | 0 (0.0)             | 0 (0.0)             | 0 (0.0)            | -                     |
| Asthma                                                    | 0 (0.0)             | 0 (0.0)             | 3 (30.0)            | 0 (0.0)            | -                     |
| Autoimmune disease                                        | 2 (2.3)             | 0 (0.0)             | 0 (0.0)             | 0 (0.0)            | -                     |
| Hematological cancer                                      | 1 (1.2)             | 0 (0.0)             | 0 (0.0)             | 0 (0.0)            | -                     |
| Non hematological cancer                                  | 8 (9.3)             | 0 (0.0)             | 1 (10.0)            | 1 (33.3)           | -                     |
| Solid-organ/cell transplantation                          | 0 (0.0)             | 0 (0.0)             | 0 (0.0)             | 0 (0.0)            | -                     |
| HCWs                                                      | 32 (37.2)           | 13 (61.9)           | 4 (40.0)            | 0 (0.0)            | 0.10                  |
| PLWH                                                      | 54 (62.8)           | 8 (38.1)            | 6 (60.0)            | 3 (100.0)          |                       |
| Prior AIDS diagnosis                                      | 21 (24.4), n = 54   | 3 (14.3), n = 8     | 1 (10.0), n = 6     | 0 (0.0)            | 0.52                  |
| Time at T0 since HIV diagnosis (years)                    | 11 (5-18)           | 11 (6-14)           | 13 (8-20)           | 14 (9-16)          | 0.90                  |
| Time on ART (years),                                      | 10.4 ± 7.4          | 8.3 ± 4.7           | 13.4 ± 7.3          | 10.3 ± 6.5         | 0.61                  |
| Nadir CD4+T cell count per µL                             | 282 (143-524)       | 250 (93-387)        | 344 (267-408)       | 335(274-379)       | 0.86                  |
| Last CD4+T cell count per µL (2021 or 2022)               | 734(601-932)        | 603 (401-923)       | 761 (647-781)       | 807 (690-1058)     | 0.75                  |
| CD4/CD8 ratio                                             | 0.93 (0.63-1.4)     | 0.96 (0.49-1.1)     | 1.0 (0.83-1.3)      | 0.96 (0.75-1.1)    | 0.74                  |
| Last plasma viral load copies/mL                          | <20 (<20-<20)       | <20 (<20-<20)       | <20 (<20-<20)       | <20 (<20-<20)      | 0.88                  |
| SARS-COV-2 infection status                               |                     |                     |                     |                    | 0.011                 |
| Naïve                                                     | 51 (59.3)           | 9 (42.9)            | 3 (30.0)            | 0 (0.0)            |                       |
| Experienced before T0                                     | 28 (32.6)           | 11 (52.4)           | 3 (30.0)            | 2 (66.7)           |                       |
| Experienced between T0 and T1                             | 7 (8.1)             | 1 (4.8)             | 4 (40.0)            | 1 (33.3)           |                       |
| First vaccine dose                                        |                     |                     |                     |                    | 0.46                  |
| BNT162b2 mRNA (Pfizer)                                    | 79 (91.9)           | 19 (90.4)           | 9 (90.0)            | 3 (100.0)          |                       |
| mRNA-1273 (Moderna)                                       | 1 (1.2)             | 1 (4.8)             | 1 (10.0)            | 0 (0.0)            |                       |
| ChAdOx1-S (Astra Zeneca)                                  | 6 (6.9)             | 1 (4.8)             | 0 (0.0)             | 0 (0.0)            |                       |
| Second vaccine dose                                       |                     |                     |                     |                    | 0.46                  |
| BNT162b2 mRNA (Pfizer)                                    | 79 (91.9)           | 19 (90.4)           | 9 (90.0)            | 3 (100.0)          |                       |
| mRNA-1273 (Moderna)                                       | 1 (1.2)             | 1 (4.8)             | 1 (10.0)            | 0 (0.0)            |                       |
| ChAdOx1-S (Astra Zeneca)                                  | 6 (6.9)             | 1 (4.8)             | 0 (0.0)             | 0 (0.0)            |                       |
| Third vaccine dose                                        |                     |                     |                     |                    | 0.48                  |
| BNT162b2 mRNA (Pfizer)                                    | 60 (71.4)           | 17 (81.0)           | 6 (60.0)            | 3 (100.0)          |                       |
| mRNA-1273 (Moderna)                                       | 26 (28.6)           | 4 (19.0)            | 4 (40.0)            | 0 (0.0)            |                       |
| Time between first and second vaccine dose (weeks)        | 4.4 (3.0-5.0)       | 3.1 (3.0-4.0)       | 3.9 (3.0-5.0)       | 3.1 (3.1-4.1)      | 0.35                  |
| Time between second vaccine dose and sample at T0 (weeks) | 24 (24-26)          | 24 (24-25)          | 24 (23-27)          | 26 (22-32)         | 0.93                  |
| Time between second and third vaccine dose (weeks)        | 30 (25-38)          | 35 (30-39)          | 32 (27-38)          | 30 (26-34)         | 0.20                  |
| Time between third vaccine dose and sample at T1 (weeks)  | 3.9 (2.9-4.8)       | 4.1 (2.9-4.7)       | 3.4 (2.8-4.9)       | 3.3 (3.1-4.0)      | 0.92                  |

|                                                                                                                                                                                 |          |           |          |         |      |
|---------------------------------------------------------------------------------------------------------------------------------------------------------------------------------|----------|-----------|----------|---------|------|
| Time between T0 and T1 (weeks)                                                                                                                                                  | 6 (4-19) | 18 (8-19) | 7 (7-18) | 7 (6-7) | 0.18 |
| <i>Results are expressed as N (%), mean <math>\pm</math> SD, or Median (Q1-Q3) as appropriate, and p-value of Fisher exact test, ANOVA or Kruskal-Wallis test respectively.</i> |          |           |          |         |      |

**Table S3.** IFN- $\gamma$  Ag1 and Ag2, Anti-S IgG, and neutralizing antibody titers against Wild-type and Omicron variants in each cluster of SARS-CoV-2 naïve population.

| Variable                                              | Cluster A<br>n = 35 | Cluster B<br>n = 18 | Cluster C<br>n = 7 | Cluster D<br>n = 3  |
|-------------------------------------------------------|---------------------|---------------------|--------------------|---------------------|
| <b>IFN-<math>\gamma</math> Ag1</b>                    |                     |                     |                    |                     |
| T0                                                    | 0.12 (0.050-0.39)   | 0.069 (0.21-1.3)    | 1.6 (1.4-2.8)      | 0.48 (0.39-0.78)    |
| T1                                                    | 0.35 (0.16-0.55)    | 1.8 (1.4-2.2)       | 3.9 (3.2-5.0)      | 0.49 (0.42-0.93)    |
| <b>IFN-<math>\gamma</math> Ag2</b>                    |                     |                     |                    |                     |
| T0                                                    | 0.16 (0.069-0.47)   | 1.2 (0.39-1.7)      | 2.2 (2.0-4.6)      | 0.25 (0.24-1.2)     |
| T1                                                    | 0.48 (0.23-0.88)    | 2.8 (1.9-3.3)       | 6.1 (5.8-7.2)      | 0.97 (0.76-1.2)     |
| <b>Anti-S IgG</b>                                     |                     |                     |                    |                     |
| T0                                                    | 308 (146-515)       | 665 (419-1157)      | 313 (259-562)      | 460 (453-1220)      |
| T1                                                    | 4100 (2190-5860)    | 11600 (7655-14975)  | 12700 (8930-15450) | 37500 (28050-42150) |
| <b>Neutralizing antibody titers against wild type</b> |                     |                     |                    |                     |
| T0                                                    | 20 (<20-40)         | 80 (40-140)         | 40 (<20-60)        | 80 (80-120)         |
| T1                                                    | 640 (320-1280)      | 2560 (2560-5120)    | 1280 (640-3840)    | 10240 (10240-10240) |
| <b>Neutralizing antibody titers against omicron</b>   |                     |                     |                    |                     |
| T0                                                    | <20 (<20-<20)       | <20 (<20-<20)       | <20 (<20-<20)      | <20 (<20-<20)       |
| T1                                                    | 80 (40-120)         | 320 (160-320)       | 160 (80-240)       | 1280 (960-1920)     |

*Results are expressed as Median (Q1-Q3).*

**Table S4.** Background characteristics of SARS-CoV-2 naïve individuals in each cluster.

| Variable                                                  | Cluster A<br>n = 35 | Cluster B<br>n = 18 | Cluster C<br>n = 7 | Cluster D<br>n = 3 | Comparison<br>p-value |
|-----------------------------------------------------------|---------------------|---------------------|--------------------|--------------------|-----------------------|
| Male sex                                                  | 16 (45.7)           | 13 (72.2)           | 4 (57.1)           | 2 (66.7)           | 0.30                  |
| Age (Years)                                               | 43.5 ± 10.9         | 41.8 ± 8.7          | 42.4 ± 11.8        | 41.0 ± 16.1        | 0.94                  |
| 18-29                                                     | 3 (8.6)             | 0 (0.0)             | 0 (0.0)            | 1 (33.3)           |                       |
| 30-39                                                     | 13 (37.1)           | 8 (44.4)            | 4 (57.1)           | 0 (0.0)            |                       |
| 40-49                                                     | 7 (20.0)            | 6 (33.3)            | 0 (0.0)            | 1 (33.3)           |                       |
| 50-59                                                     | 10 (28.6)           | 3 (16.7)            | 2 (28.6)           | 1 (33.3)           |                       |
| ≥60                                                       | 2 (5.7)             | 1 (5.6)             | 1 (14.3)           | 0 (0.0)            |                       |
| BMI (kg/m <sup>2</sup> )                                  | 25.3 ± 4.0, N = 34  | 25.2 ± 3.6          | 25.0 ± 2.8         | 37.5 ± 17.3        | 0.73                  |
| < (<18.5)                                                 | 1 (2.9)             | 0 (0.0)             | 0 (0.0)            | 0 (0.0)            |                       |
| Normal range (18.5-24.9)                                  | 14 (41.2)           | 8 (44.4)            | 2 (28.6)           | 1 (33.3)           |                       |
| Overweight (25-29.9)                                      | 17 (50.0)           | 8 (44.4)            | 5 (71.4)           | 0 (0.0)            |                       |
| Obese (≥30)                                               | 2 (5.9)             | 2 (11.1)            | 0 (0.0)            | 2 (66.7)           |                       |
| Ethnicity                                                 | N = 22              | N = 9               | N = 2              | N = 2              | -                     |
| Caucasian                                                 | 16 (72.7)           | 3 (33.3)            | 0 (0.0)            | 0 (0.0)            |                       |
| African                                                   | 3 (13.6)            | 6 (66.7)            | 2 (100.0)          | 2 (100.0)          |                       |
| Other or unknown                                          | 3 (13.6)            | 0 (0.0)             | 0 (0.0)            | 0 (0.0)            |                       |
| Medical history                                           |                     |                     |                    |                    |                       |
| Diabetes mellitus                                         | 0 (0.0)             | 1 (5.6)             | 0 (0.0)            | 0 (0.0)            | -                     |
| Hypertension                                              | 3 (8.6)             | 2 (11.1)            | 1 (14.3)           | 2 (66.7)           | 0.078                 |
| Heart failure coronary artery disease                     | 1 (2.9)             | 0 (0.0)             | 0 (0.0)            | 0 (0.0)            | -                     |
| Stroke                                                    | 0 (0.0)             | 0 (0.0)             | 0 (0.0)            | 0 (0.0)            | -                     |
| Liver disease                                             | 0 (0.0)             | 0 (0.0)             | 0 (0.0)            | 0 (0.0)            | -                     |
| Kidney disease                                            | 0 (0.0)             | 0 (0.0)             | 0 (0.0)            | 0 (0.0)            | -                     |
| Chronic lung disease                                      | 0 (0.0)             | 0 (0.0)             | 0 (0.0)            | 0 (0.0)            | -                     |
| Asthma                                                    | 0 (0.0)             | 0 (0.0)             | 0 (0.0)            | 1 (33.3)           | -                     |
| Autoimmune disease                                        | 2 (5.7)             | 0 (0.0)             | 0 (0.0)            | 0 (0.0)            | -                     |
| Hematological cancer                                      | 1 (2.9)             | 0 (0.0)             | 0 (0.0)            | 0 (0.0)            | -                     |
| Non hematological cancer                                  | 3 (8.6)             | 2 (11.1)            | 0 (0.0)            | 1 (33.3)           | -                     |
| Solid-organ/cell transplantation                          | 0 (0.0)             | 0 (0.0)             | 0 (0.0)            | 0 (0.0)            | -                     |
| HCW                                                       | 13 (37.1)           | 9 (50.0)            | 5 (71.4)           | 1 (33.3)           |                       |
| PLWH                                                      | 22 (62.9)           | 9 (50.0)            | 2 (28.6)           | 2 (66.7)           | 0.38                  |
| Prior AIDS diagnosis                                      | 9 (40.9), n = 22    | 3 (33.3), n = 9     | 1 (50.0), n = 2    | 1 (50.0), n = 2    | 1.0                   |
| Time at T0 since HIV diagnosis (years)                    | 11 (5-14)           | 15 (7-18)           | 13 (10-16)         | 19 (13-25)         | 0.88                  |
| Time on ART (years),                                      | 9.9 ± 7.3           | 11.3 ± 7.2          | 7.7 ± 3.1          | 15.3 ± 11.4        | 0.71                  |
| Nadir CD4+T cell count per µL                             | 284 (136-480)       | 208 (199-416)       | 182 (146-218)      | 315(263-367)       | 0.88                  |
| Last CD4+T cell count per µL (2021 or 2022)               | 707 (552-842)       | 842 (600-1159)      | 513 (432-595)      | 780 (778-781)      | 0.46                  |
| CD4/CD8 ratio                                             | 0.89 (0.65-1.3)     | 1.3 (0.94-2.0)      | 0.86 (0.70-1.0)    | 1.2 (1.2-1.3)      | 0.40                  |
| Last plasma viral load copies/mL                          | <20 (<20-<20)       | <20 (<20-<20)       | 33 (21--44)        | <20 (<20-<20)      | 0.43                  |
| SARS-COV-2 infection status                               |                     |                     |                    |                    | -                     |
| Naïve                                                     | 35 (100.0)          | 18 (100.0)          | 7 (100.0)          | 3 (100.0)          |                       |
| Experienced before T0                                     | 0 (0.0)             | 0 (0.0)             | 0 (0.0)            | 0 (0.0)            |                       |
| Experienced between T0 and T1                             | 0 (0.0)             | 0 (0.0)             | 0 (0.0)            | 0 (0.0)            |                       |
| First vaccine dose                                        |                     |                     |                    |                    | 0.24                  |
| BNT162b2 mRNA (Pfizer)                                    | 34 (97.1)           | 15 (83.3)           | 7 (100.0)          | 3 (100.0)          |                       |
| mRNA-1273 (Moderna)                                       | 0 (0.0)             | 1 (5.6)             | 0 (0.0)            | 0 (0.0)            |                       |
| ChAdOx1-S (Astra Zeneca)                                  | 1 (2.9)             | 2 (11.1)            | 0 (0.0)            | 0 (0.0)            |                       |
| Second vaccine dose                                       |                     |                     |                    |                    | 0.24                  |
| BNT162b2 mRNA (Pfizer)                                    | 34 (97.1)           | 15 (83.3)           | 7 (100.0)          | 3 (100.0)          |                       |
| mRNA-1273 (Moderna)                                       | 0 (0.0)             | 1 (5.6)             | 0 (0.0)            | 0 (0.0)            |                       |
| ChAdOx1-S (Astra Zeneca)                                  | 1 (2.9)             | 2 (11.1)            | 0 (0.0)            | 0 (0.0)            |                       |
| Third vaccine dose                                        |                     |                     |                    |                    | 0.41                  |
| BNT162b2 mRNA (Pfizer)                                    | 28 (80.0)           | 11 (61.1)           | 6 (85.7)           | 2 (66.7)           |                       |
| mRNA-1273 (Moderna)                                       | 7 (20.0)            | 7 (38.9)            | 1 (14.3)           | 1 (33.3)           |                       |
| Time between first and second vaccine dose (weeks)        | 4.9 (3.0-5.0)       | 3.1 (3.0-4.8)       | 3.1 (3.0-3.7)      | 4.3 (3.9-4.9)      | 0.23                  |
| Time between second vaccine dose and sample at T0 (weeks) | 24 (24-25)          | 24 (24-26)          | 24 (24-26)         | 23 (22-25)         | 0.48                  |
| Time between second and third vaccine dose (weeks)        | 27 (25-37)          | 34 (30-39)          | 38 (36-39)         | 31 (28-32)         | 0.073                 |

|                                                          |               |               |               |               |      |
|----------------------------------------------------------|---------------|---------------|---------------|---------------|------|
| Time between third vaccine dose and sample at T1 (weeks) | 4.0 (2.9-4.8) | 4.2 (3.1-5.1) | 4.1 (3.9-4.7) | 3.7 (3.2-5.9) | 0.88 |
| Time between T0 and T1 (weeks)                           | 6 (4-19)      | 11 (4-19)     | 18 (13-19)    | 7 (7-13)      | 0.62 |

*Results are expressed as N (%), mean  $\pm$  SD, or Median (Q1-Q3) as appropriate, and p-value of Fisher exact test, ANOVA or Kruskal-Wallis test.*
